# Supplementary material for: Mapk14 is a Prognostic Biomarker and Correlates with the Clinicopathological Features and Immune Infiltration of Colorectal Cancer
Source: Front Cell Dev Biol. 2022 Jan 24;10:817800. doi: 10.3389/fcell.2022.817800 (PMC8818961; doi:10.3389/fcell.2022.817800)
Supplement: Supplementary file 2 [file Table3.XLSX]

## Sheet: COADREAD_mc3
sample	chr	start	end	reference	alt	gene	effect	Amino_Acid_Change	DNA_VAF	SIFT	PolyPhen
TCGA-AA-3947-01	6	35995921	35995921	G	A	MAPK14	5'UTR		0.38
TCGA-AA-3984-01	6	36075327	36075327	G	A	MAPK14	Missense_Mutation	p.D313N	0.38	deleterious(0.01)	possibly_damaging(0.472)
TCGA-AA-A00N-01	6	36040747	36040747	C	A	MAPK14	Missense_Mutation	p.L135I	0.2	deleterious(0)	probably_damaging(0.974)
TCGA-AA-A010-01	6	36041480	36041480	G	A	MAPK14	Missense_Mutation	p.A144T	0.41	deleterious(0)	possibly_damaging(0.873)
TCGA-CA-6717-01	6	36020603	36020603	A	C	MAPK14	Missense_Mutation	p.N82H	0.16	deleterious(0)	probably_damaging(0.998)
TCGA-CK-4951-01	6	35995890	35995890	G	A	MAPK14	5'UTR		0.3
TCGA-DM-A1D7-01	6	36076365	36076365	G	A	MAPK14	3'UTR		0.46
TCGA-WS-AB45-01	6	36040669	36040670	-	T	MAPK14	Frame_Shift_Ins	p.M109Ifs*17	0.14
TCGA-EI-6917-01	6	36040714	36040714	G	A	MAPK14	Missense_Mutation	p.D124N	0.22	tolerated(0.09)	benign(0.068)

## Sheet: Gistic2_CopyNumber_Gistic2
sample	TCGA-3L-AA1B-01	TCGA-4N-A93T-01	TCGA-4T-AA8H-01	TCGA-5M-AAT4-01	TCGA-5M-AAT5-01	TCGA-5M-AAT6-01	TCGA-5M-AATA-01	TCGA-5M-AATE-01	TCGA-A6-2671-01	TCGA-A6-2672-01	TCGA-A6-2674-01	TCGA-A6-2675-01	TCGA-A6-2676-01	TCGA-A6-2677-01	TCGA-A6-2678-01	TCGA-A6-2679-01	TCGA-A6-2680-01	TCGA-A6-2681-01	TCGA-A6-2682-01	TCGA-A6-2683-01	TCGA-A6-2684-01	TCGA-A6-2685-01	TCGA-A6-2686-01	TCGA-A6-3807-01	TCGA-A6-3809-01	TCGA-A6-3810-01	TCGA-A6-4105-01	TCGA-A6-4107-01	TCGA-A6-5656-01	TCGA-A6-5657-01	TCGA-A6-5659-01	TCGA-A6-5660-01	TCGA-A6-5661-01	TCGA-A6-5662-01	TCGA-A6-5664-01	TCGA-A6-5665-01	TCGA-A6-5666-01	TCGA-A6-5667-01	TCGA-A6-6137-01	TCGA-A6-6138-01	TCGA-A6-6140-01	TCGA-A6-6141-01	TCGA-A6-6142-01	TCGA-A6-6648-01	TCGA-A6-6649-01	TCGA-A6-6650-01	TCGA-A6-6651-01	TCGA-A6-6652-01	TCGA-A6-6653-01
MAPK14	-0.01	0	-0.023	-0.009	0.057	-0.006	-0.208	0.01	-0.149	0.002	0.096	0.205	0.006	-0.031	0.011	0.245	0.003	-0.059	-0.011	0.013	0.013	0	-0.431	0.009	0.001	0.571	0.031	0.274	-0.023	-0.005	0.236	0.111	0.001	0.005	0.005	0	-0.02	0.009	0.007	0.579	-0.011	-0.001	0.261	0.746	-0.165	0.396	0.086	-0.019	0.005
[truncated: 567 more columns]

## Sheet: HiSeqV2
sample	TCGA-CA-5256-01	TCGA-AZ-6599-01	TCGA-AA-3655-01	TCGA-A6-6137-01	TCGA-CK-4952-01	TCGA-A6-5657-01	TCGA-AD-6963-01	TCGA-AA-3663-11	TCGA-A6-6138-01	TCGA-A6-A567-01	TCGA-AA-3712-11	TCGA-D5-6928-01	TCGA-AZ-6598-01	TCGA-D5-6931-01	TCGA-G4-6295-01	TCGA-AA-A01X-01	TCGA-AZ-4313-01	TCGA-DM-A0XD-01	TCGA-D5-6535-01	TCGA-AA-3509-01	TCGA-DM-A28E-01	TCGA-A6-5667-11	TCGA-G4-6307-01	TCGA-A6-2682-01	TCGA-CM-5868-01	TCGA-CK-4947-01	TCGA-D5-5540-01	TCGA-A6-4105-01	TCGA-A6-6651-01	TCGA-G4-6625-01	TCGA-CM-5860-01	TCGA-DM-A28G-01	TCGA-A6-5666-01	TCGA-A6-2675-11	TCGA-AA-3516-11	TCGA-AZ-6605-01	TCGA-CA-5797-01	TCGA-D5-6930-01	TCGA-5M-AAT4-01	TCGA-AA-3685-01	TCGA-D5-6924-01	TCGA-CA-6718-01	TCGA-AZ-6603-01	TCGA-CM-5862-01	TCGA-AZ-6598-11	TCGA-AA-A01Z-01	TCGA-DM-A0X9-01	TCGA-A6-A566-01	TCGA-A6-5662-11
MAPK14	11.0543	10.0044	10.7365	10.7645	11.2699	10.8301	10.6354	10.8568	11.5122	11.2788	10.6921	10.5414	10.1206	10.6549	11.0257	10.9978	10.2885	9.9146	11.0326	11.5452	10.84	10.5824	9.9594	11.0206	10.2754	10.7141	11.7224	11.0807	10.8831	10.8593	10.7494	10.6505	10.7621	10.6688	10.9359	10.3478	10.868	10.2572	10.3633	10.8755	11.0537	10.1673	10.6163	11.2435	10.5363	10.2601	10.3127	10.3978	10.9032
[truncated: 385 more columns]
